# Supplementary material
Source: Elsevier journal article supplement (https://www.sciencedirect.com/science/article/pii/S1885585724002706)
Supplement: mmc1 [file mmc1.pdf]

Sanchis J, et al. Geriatric conditions and invasive management in frail patients with NSTEMI. A subgroup analysis of a randomized clinical trial. *Rev Esp Cardiol.* 2024.

**SUPPLEMENTARY DATA±**

**Table 1 of the supplementary data.** Baseline patient characteristics

|                                             | Invasive | Conservative | Standardized differences |
|---------------------------------------------|----------|--------------|--------------------------|
| N = 167                                     | 84       | 83           |                          |
| <b>Demographic data</b>                     |          |              |                          |
| <i>Age, y</i>                               | 86 ± 5   | 85 ± 5       | .218                     |
| <i>Male sex</i>                             | 32 (38)  | 47 (57)      | .401                     |
| <i>Diabetes</i>                             | 50 (60)  | 43 (52)      | .155                     |
| <i>Insulin treatment</i>                    | 19 (23)  | 19 (23)      | .006                     |
| <i>Hypertension</i>                         | 77 (92)  | 76 (92)      | .004                     |
| <i>Hypercholesterolemia</i>                 | 63 (75)  | 65 (78)      | .078                     |
| <i>Current smoker</i>                       | 3 (3.6)  | 2 (2.4)      | .230                     |
| <i>Peripheral artery disease</i>            | 9 (11)   | 9 (11)       | .004                     |
| <i>Chronic kidney disease</i>               | 39 (46)  | 35 (42)      | .085                     |
| <i>Dialysis</i>                             | 3 (3.6)  | 2 (2.4)      | .068                     |
| <i>Prior myocardial infarction</i>          | 19 (23)  | 32 (39)      | .349                     |
| <i>Prior PCI</i>                            | 19 (23)  | 33 (40)      | .374                     |
| <i>Prior CABG</i>                           | 5 (6.0)  | 11 (13)      | .248                     |
| <i>Prior history of atrial fibrillation</i> | 26 (31)  | 19 (23)      | .181                     |
| <i>Prior stroke</i>                         | 13 (16)  | 17 (21)      | .203                     |
| <i>Prior admission for heart failure</i>    | 13 (16)  | 16 (19)      | .100                     |
| <b>Hemodynamic data</b>                     |          |              |                          |
| <i>Systolic blood pressure, mmHg</i>        | 139 ± 27 | 141 ± 23     | .060                     |
| <i>Diastolic blood pressure, mmHg</i>       | 69 ± 16  | 70 ± 12      | .105                     |
| <i>Heart rate, beats/min</i>                | 77 ± 15  | 79 ± 21      | .095                     |
| <i>Killip class</i>                         |          |              | .0049                    |

Sanchis J, et al. Geriatric conditions and invasive management in frail patients with NSTEMI. A subgroup analysis of a randomized clinical trial. *Rev Esp Cardiol.* 2024.

|                                                                                                                                                                           |            |            |      |
|---------------------------------------------------------------------------------------------------------------------------------------------------------------------------|------------|------------|------|
| I                                                                                                                                                                         | 67 (80)    | 61 (74)    |      |
| II                                                                                                                                                                        | 11 (13)    | 19 (23)    |      |
| III                                                                                                                                                                       | 6 (7.1)    | 3 (3.6)    |      |
| <b>ECG</b>                                                                                                                                                                |            |            |      |
| <i>Normal ECG</i>                                                                                                                                                         | 26 (31)    | 27 (33)    | .127 |
| <i>ST-segment depression</i>                                                                                                                                              | 34 (41)    | 25 (30)    | .187 |
| <i>T-wave inversion</i>                                                                                                                                                   | 9 (11)     | 16 (19)    | .043 |
| <i>Left bundle branch block</i>                                                                                                                                           | 10 (12)    | 10 (12)    | .040 |
| <i>Pacemaker</i>                                                                                                                                                          | 5 (6.0)    | 5 (6.0)    | .003 |
| <b>Blood test</b>                                                                                                                                                         |            |            |      |
| <i>Hemoglobin, g/dL</i>                                                                                                                                                   | 12.4 ± 1.6 | 12.4 ± 1.8 | .008 |
| <i>Creatinine, mg/dL</i>                                                                                                                                                  | 1.4 ± 0.9  | 1.3 ± 0.7  | .056 |
| CABG, coronary artery bypass grafting; PCI, percutaneous coronary intervention.<br>Continuous variables are presented as mean ± SD, and categorical variables as No. (%). |            |            |      |

Sanchis J, et al. *Geriatric conditions and invasive management in frail patients with NSTEMI. A subgroup analysis of a randomized clinical trial. Rev Esp Cardiol. 2024.*
